# Supplementary material for: Elevated Ozone Reduces the Quality of Tea Leaves but May Improve the Resistance of Tea Plants
Source: MDPI journal article supplement (doi:10.3390/plants13081108), 2024-04-16
Supplement: s1 [file s1]

**Table S1** The retention time of caffeine and individual catechins.

| Compounds               | CAF    | C      | EC     | EGC    | ECG    | EGCG   |
|-------------------------|--------|--------|--------|--------|--------|--------|
| Retention time<br>(min) | 21.253 | 18.335 | 25.323 | 16.388 | 37.403 | 26.005 |

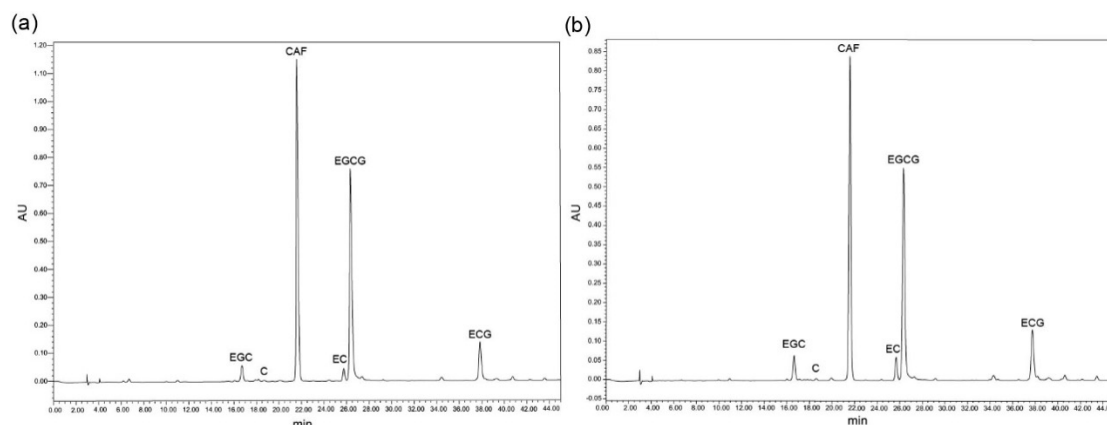

**Figure S1.** HPLC chromatograms of tea leaves under (a) ambient air and (b) elevated O<sub>3</sub> treatment. C, catechin; EC, epicatechin; ECG, epicatechin gallate; EGC, epigallocatechin; EGCG, epigallocatechin gallate; CAF, caffeine.

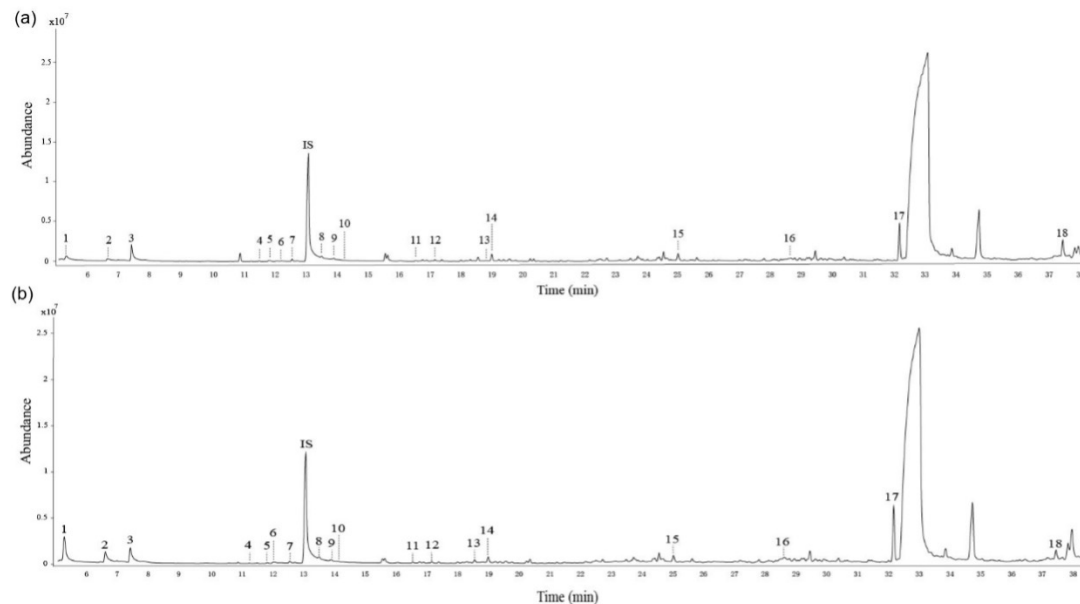

**Figure S2.** The total ion chromatogram of volatile components in tea leaves under (a) ambient air and (b) elevated O<sub>3</sub> treatment. 1, Toluene; 2, E-2-hexenal; 3, Cyclohexanol; 4, Undecane; 5, 2-Ethyl-1-hexanol; 6, Benzyl alcohol; 7, Dodecane; 8, Trans-Furanic linalool oxid; 9, 2,4-Dimethyl-1-heptanol; 10, Hexyl octyl ether; 11, 1-Methoxyadamantane; 12, Tridecane; 13, Geraniol; 14, Pentadecane; 15, 2,4-Di-tert-butylphenol; 16, 6-epi-shyobunol; 17, Neophytadiene; 18, Phytol; IS, n-octanol.
